# Supplementary material
Source: PubMed Central journal article supplement (PMC5880041)
Supplement: NIHMS952667-supplement-Supp1.pdf [file NIHMS952667-supplement-Supp1.pdf]

Supplement of Atmos. Chem. Phys., 16, 13561–13577, 2016  
<http://www.atmos-chem-phys.net/16/13561/2016/>  
doi:10.5194/acp-16-13561-2016-supplement  
© Author(s) 2016. CC Attribution 3.0 License.

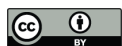

Atmospheric  
Chemistry  
and Physics  
Open Access  
EGU

*Supplement of*

## **Why do models overestimate surface ozone in the Southeast United States?**

**Katherine R. Travis et al.**

*Correspondence to:* Katherine R. Travis ([ktravis@fas.harvard.edu](mailto:ktravis@fas.harvard.edu))

The copyright of individual parts of the supplement might differ from the CC-BY 3.0 licence.

# Supplementary Material

Table S1 – Species Added to GEOS-Chem

| Species | Note                                                                 |
|---------|----------------------------------------------------------------------|
| HPALD   | Hydroperoxyaldehydes (C <sub>5</sub> H <sub>8</sub> O <sub>3</sub> ) |
| HC187   | Epoxide oxidation product m/z 187-189                                |
| DHDN    | C <sub>5</sub> dihydroxydinitrate                                    |

Table S2 – Reaction Rates and Productions Updated in GEOS-Chem

| Reaction                                                                                                                                                                                                                                                                                                                         | Reference                                                             | Rate Constant                         | Reference                             |
|----------------------------------------------------------------------------------------------------------------------------------------------------------------------------------------------------------------------------------------------------------------------------------------------------------------------------------|-----------------------------------------------------------------------|---------------------------------------|---------------------------------------|
| $\text{RIO}_2 + \text{HO}_2 \rightarrow 0.937\text{RIP} + 0.063\text{OH} + 0.025\text{MACR} + 0.038\text{MVK} + 0.063\text{HO}_2 + 0.063\text{CH}_2\text{O}$                                                                                                                                                                     | (Liu et al., 2013)                                                    | $2.06\text{E-}13 * \exp(1300/T)$      | (Saunders et al., 2003)               |
| $\text{RIO}_2 + \text{NO} \rightarrow 0.91\text{NO}_2 + 0.82\text{HO}_2 + 0.82\text{CH}_2\text{O} + 0.476\text{MVK} + 0.344\text{MACR} + 0.058\text{HC}_5 + 0.03\text{DIBOO} + 0.009\text{ISOPND} + 0.081\text{ISOPNB}$                                                                                                          | (Liu et al., 2013; Fisher et al., 2016)                               | $2.7\text{E-}12 * \exp(350/T)$        | (Paulot et al., 2009a)                |
| $\text{RIO}_2 \rightarrow \text{HO}_2 + \text{HPALD}$                                                                                                                                                                                                                                                                            | (Peeters et al., 2009; Peeters and Muller, 2010; Crouse et al., 2011) | $4.07\text{E}8 * \exp(-7694/T)$       | Rate adjusted by Crouse et al. (2011) |
| $\text{RIO}_2 + \text{RIO}_2 \rightarrow 0.91\text{HO}_2 + 0.75\text{CH}_2\text{O} + 0.45\text{MVK} + 0.29\text{MACR} + 0.09\text{DIBOO} + 1.11\text{HC}_5 + 0.29\text{CO}$                                                                                                                                                      | (Xie et al., 2013)                                                    | 2.3E-12                               | (Xie et al., 2013)                    |
| $\text{HPALD} + \text{OH} \rightarrow \text{MGLY} + \text{CO} + \text{CH}_2\text{O} + \text{OH}$                                                                                                                                                                                                                                 | (Squire et al., 2015)                                                 | 5.1E-11                               | (Wolfe et al., 2012)                  |
| $\text{HPALD} + h\nu \rightarrow \text{OH} + \text{HO}_2 + 0.5\text{GLYC} + 0.25 \text{GLYX} + 0.25\text{MGLY} + \text{CH}_2\text{O} + 0.5 \text{HAC}$                                                                                                                                                                           | (Stavrakou et al., 2010)                                              | Rate is equivalent to MACR photolysis | (Peeters and Muller, 2010)            |
| $\text{ISOPND} + \text{OH} \rightarrow 0.1\text{IEPOX} + 0.9 \text{ISOPNDO}_2 + 0.1\text{NO}_2$                                                                                                                                                                                                                                  | (Jacobs et al., 2014)                                                 | $1.2\text{E-}11 * \exp(652/T)$        | (Lee et al., 2014)                    |
| $\text{ISOPNB} + \text{OH} \rightarrow 0.1\text{IEPOX} + 0.90\text{ISOPNBO}_2 + 0.1\text{NO}_2$                                                                                                                                                                                                                                  | (Jacobs et al., 2014)                                                 | $2.4\text{E-}12 * \exp(745/T)$        | (Lee et al., 2014)                    |
| $\text{ISOPNDO}_2 + \text{NO} \rightarrow 0.019\text{MACRN} + 0.057\text{HCOOH} + 0.27\text{HAC} + 0.210\text{ETHLN} + 0.15\text{CH}_2\text{O} + 0.790\text{NO}_2 + 0.3\text{GLYC} + 0.3\text{PROPNN} + 0.61\text{HO}_2 + 0.27\text{DHDN} + 0.075\text{MVKN} + 0.057\text{ISOPNDO}_2^{(a)}$                                      | (Lee et al., 2014)                                                    | $2.4\text{E-}12 * \exp(360/T)$        | (Lee et al., 2014)                    |
| $\text{ISOPNBO}_2 + \text{NO} \rightarrow 0.09\text{GLYC} + 0.09\text{HAC} + 0.69\text{CH}_2\text{O} + 0.44\text{MACRN} + 0.69\text{HO}_2 + 0.26\text{MVKN} + 0.88\text{NO}_2 + 0.21\text{DHDN}$                                                                                                                                 | (Lee et al., 2014)                                                    | $2.4\text{E-}12 * \exp(360/T)$        | (Lee et al., 2014)                    |
| $\text{ISOPNDO}_2 + \text{HO}_2 \rightarrow 0.01\text{MACRN} + 0.2\text{HAC} + 0.2\text{ETHLN} + 0.07\text{CH}_2\text{O} + 0.23\text{GLYC} + 0.23\text{PROPNN} + 0.5\text{HO}_2 + 0.5\text{OH} + 0.06\text{MVKN} + 0.5\text{ISNP}^{(b)}$                                                                                         | (Lee et al., 2014)                                                    | $8.7\text{E-}14 * \exp(1650/T)$       | (Lee et al., 2014)                    |
| $\text{ISOPNBO}_2 + \text{HO}_2 \rightarrow 0.06\text{GLYC} + 0.06\text{HAC} + 0.44\text{CH}_2\text{O} + 0.28\text{MACRN} + 0.16\text{MVKN} + 0.06\text{NO}_2 + 0.44\text{HO}_2 + 0.5\text{OH} + 0.5\text{ISNP}^{(b)}$                                                                                                           | (Lee et al., 2014)                                                    | $8.7\text{E-}14 * \exp(1650/T)$       | (Lee et al., 2014)                    |
| $\text{ISOPND} + \text{O}_3 \rightarrow 0.06\text{NO}_2 + 0.37\text{OH} + 0.24\text{PROPNN} + 0.26\text{ETHLN} + 0.26\text{HAC} + 0.24\text{GLYC} + 0.63\text{CO}_2 + 0.24\text{MOH} + 0.09\text{EOH} + 0.2\text{CH}_2\text{O} + 0.1\text{MCO}_3 + 0.06\text{GLYX} + 0.16\text{HAC} + 0.14\text{PROPNN} + 0.3\text{HNO}_3^{(d)}$ | (Lee et al., 2014)                                                    | 2.9E-17                               | (Lee et al., 2014)                    |
| $\text{ISOPNB} + \text{O}_3 \rightarrow 0.05\text{HO}_2 + 0.05\text{OH} + 0.11\text{MVKN} + 0.32\text{MACRN} + 0.16\text{HCOOH} + 0.62\text{CH}_2\text{O} + 0.36\text{CO}_2 + 0.21\text{CO} + 0.06\text{PROPNN} + 0.36\text{PROPNN}^{(c)}$                                                                                       | (Lee et al., 2014)                                                    | 3.7E-19                               | (Lee et al., 2014)                    |

|                                                                                                                                                                                                                 |                        |                                     |                        |
|-----------------------------------------------------------------------------------------------------------------------------------------------------------------------------------------------------------------|------------------------|-------------------------------------|------------------------|
| 0.1MVKN + 0.41HNO <sub>3</sub> <sup>(d)</sup>                                                                                                                                                                   |                        |                                     |                        |
| IEPOX + OH → IEPOXOO                                                                                                                                                                                            | (Paulot et al., 2009b) | 4.82E-11*exp(-400/T) <sup>(e)</sup> | (Bates et al., 2014)   |
| IEPOXOO + HO <sub>2</sub> → 0.085HAC + 0.025GLYC + 0.085GLYX + 0.085MGLY + 1.125OH + 0.825HO <sub>2</sub> + 1.1CO <sub>2</sub> + 0.375CH <sub>2</sub> O + 0.278HCOOH + 0.6CO + 0.44HC187 <sup>(f)</sup>         | (Bates et al., 2014)   | 2.06E-13*exp(1300/T)                | (Paulot et al., 2009b) |
| IEPOXOO + NO → 0.117HAC + 0.088GLYC + 0.088GLYX + 0.088MGLY + 0.125OH + 0.825HO <sub>2</sub> + 0.8CO <sub>2</sub> + 0.375CH <sub>2</sub> O + 0.142HCOOH + 0.678CO + NO <sub>2</sub> + 0.473HC187 <sup>(f)</sup> | (Bates et al., 2014)   | 2.7E-12exp*(350/T)                  | (Paulot et al., 2009b) |
| HC187 + OH → 0.5MCO <sub>3</sub> + 0.5MGLY + 0.5HO <sub>2</sub> + 0.5CO + CH <sub>2</sub> O                                                                                                                     | (Bates et al., 2014)   | 1.4E-11                             | (Bates et al., 2014)   |

<sup>(a)</sup> The yields are not identical to the Lee et al. (2014) values and there is artificial recycling of ISOPNDO<sub>2</sub> to account for non-unity reactants (i.e. in Lee et al. (2014) one ISOPNDO<sub>2</sub> reacts with 1.06ISOPNDO<sub>2</sub>).

<sup>(b)</sup> In Lee et al. (2014), a C5 hydroperoxide is formed (ROOH). In order to close the nitrogen budget this would have to be ISNP – a peroxide species with a nitrate group.

<sup>(c)</sup> Replace C4NACID in Lee et al. (2014) with PROPNN.

<sup>(d)</sup> HNO<sub>3</sub> added to this reaction to close the nitrogen budget, as we replace ethyl nitrate with its oxidation product, peroxyacetyl nitrate.

<sup>(e)</sup> Update pre-exponential factor of this reaction in globchem.dat from Bates et al. (2014).

<sup>(f)</sup> Other organic products were identified by Bates et al. (2014). These structural isomers are replaced with CO for the epoxide product (m/z 201) and a new species (also added as a tracer) is added to GEOS-Chem to account for the m/z 187 and 189 isomers.

## References

- Bates, K. H., Crouse, J. D., St Clair, J. M., Bennett, N. B., Nguyen, T. B., Seinfeld, J. H., Stoltz, B. M., and Wennberg, P. O.: Gas Phase Production and Loss of Isoprene Epoxydiols, *Journal of Physical Chemistry A*, 118, 1237-1246, Doi 10.1021/Jp4107958, 2014.
- Crouse, J. D., Paulot, F., Kjaergaard, H. G., and Wennberg, P. O.: Peroxy radical isomerization in the oxidation of isoprene, *Physical Chemistry Chemical Physics: PCCP*, 13, 13607-13613, 10.1039/c1cp21330j, 2011.
- Fisher, J. A., Jacob, D. D., Travis, K. R., Kim, P. S., Marais, E., Miller, C. C., Yu, K., Zhu, L., Yantosca, R. M., Sulprizio, M. P., Mao, J., Wennberg, P. O., Crouse, J. D., Teng, A. P., Nguyen, T. B., St Clair, J. M., Romer, P., Nault, B. A., Wooldridge, P. J., Jimenez, J. L., Campuzano-Jost, P., Day, D. A., Shepson, P. B., Xiong, F., Blake, D. R., Goldstein, A. H., Misztal, P. K., Hanisco, T. F., Wolfe, G. M., Ryerson, T. B., Wisthaler, A., and Mikoviny, T.: Organic nitrate chemistry and its implications for nitrogen budgets in an isoprene- and monoterpene-rich atmosphere: constraints from aircraft (SEAC4RS) and ground-based (SOAS) observations in the Southeast US, *Atmospheric Chemistry and Physics Discussions*, submitted, 2016.
- Jacobs, M. I., Burke, W. J., and Elrod, M. J.: Kinetics of the reactions of isoprene-derived hydroxynitrates: gas phase epoxide formation and solution phase hydrolysis, *Atmospheric Chemistry and Physics*, 14, 8933-8946, 10.5194/acp-14-8933-2014, 2014.
- Lee, L., Teng, A. P., Wennberg, P. O., Crouse, J. D., and Cohen, R. C.: On Rates and Mechanisms of OH and O<sub>3</sub> Reactions with Isoprene-Derived Hydroxy Nitrates, *The Journal of Physical Chemistry. A*, 118, 1622-1637, 10.1021/jp4107603, 2014.
- Liu, Y. J., Herdinger-Blatt, I., McKinney, K. A., and Martin, S. T.: Production of methyl vinyl ketone and methacrolein via the hydroperoxyl pathway of isoprene oxidation, *Atmospheric Chemistry and Physics*, 13, 5715-5730, 10.5194/acp-13-5715-2013, 2013.
- Paulot, F., Crouse, J. D., Kjaergaard, H. G., Kroll, J. H., Seinfeld, J. H., and Wennberg, P. O.: Isoprene photooxidation: new insights into the production of acids and organic nitrates, *Atmospheric Chemistry and Physics*, 9, 1479-1501, 2009a.
- Paulot, F., Crouse, J. D., Kjaergaard, H. G., Kurten, A., St Clair, J. M., Seinfeld, J. H., and Wennberg, P. O.: Unexpected Epoxide Formation in the Gas-Phase Photooxidation of Isoprene, *Science*, 325, 730-733, Doi 10.1126/Science.1172910, 2009b.
- Peeters, J., Nguyen, T. L., and Vereecken, L.: HOx radical regeneration in the oxidation of isoprene, *Physical chemistry chemical physics : PCCP*, 11, 5935-5939, 10.1039/b908511d, 2009.
- Peeters, J., and Muller, J. F.: HO(x) radical regeneration in isoprene oxidation via peroxy radical isomerisations. II: experimental evidence and global impact, *Physical Chemistry Chemical Physics : PCCP*, 12, 14227-14235, 10.1039/c0cp00811g, 2010.

- Saunders, S. M., Jenkin, M. E., Derwent, R. G., and Pilling, M. J.: Protocol for the development of the Master Chemical Mechanism, MCM v3 (Part A): tropospheric degradation of non-aromatic volatile organic compounds, *Atmospheric Chemistry and Physics*, 3, 161-180, 2003.
- Squire, O. J., Archibald, A. T., Griffiths, P. T., Jenkin, M. E., Smith, D., and Pyle, J. A.: Influence of isoprene chemical mechanism on modelled changes in tropospheric ozone due to climate and land use over the 21st century, *Atmospheric Chemistry and Physics*, 15, 5123-5143, 10.5194/acp-15-5123-2015, 2015.
- Stavrakou, T., Peeters, J., and Müller, J. F.: Improved global modelling of HO<sub>x</sub> recycling in isoprene oxidation: evaluation against the GABRIEL and INTEX-A aircraft campaign measurements, *Atmospheric Chemistry and Physics*, 10, 9863-9878, 10.5194/acp-10-9863-2010, 2010.
- Wolfe, G. M., Crouse, J. D., Parrish, J. D., St Clair, J. M., Beaver, M. R., Paulot, F., Yoon, T. P., Wennberg, P. O., and Keutsch, F. N.: Photolysis, OH reactivity and ozone reactivity of a proxy for isoprene-derived hydroperoxyenals (HPALDs), *Physical Chemistry Chemical Physics: PCCP*, 14, 7276-7286, 10.1039/c2cp40388a, 2012.
- Xie, Y., Paulot, F., Carter, W. P. L., Nolte, C. G., Luecken, D. J., Hutzell, W. T., Wennberg, P. O., Cohen, R. C., and Pinder, R. W.: Understanding the impact of recent advances in isoprene photooxidation on simulations of regional air quality, *Atmospheric Chemistry and Physics*, 13, 8439-8455, 10.5194/acp-13-8439-2013, 2013.

## Evaluation of NEI11v1 NO<sub>x</sub> Scaling

We consider the uncertainty in the scaling of NO<sub>x</sub> emissions from NEI11v1 by 50% due to the presence of soil NO<sub>x</sub> in the Southeast US. As shown in Figure 1, surface NO<sub>x</sub> emissions in the Southeast US in GEOS-Chem for August and September 2013 include fuel combustion, soils, fertilizer use, and open fires, which total 153 Gg N. Emissions from soils and fertilizer use total 31 and 13 Gg N, respectively. Fuel combustion contributes 104 Gg N after scaling NEI11v1, and open fires the remaining 5 Gg N. Emissions of NO<sub>x</sub> from soils vary greatly with precipitation patterns, fertilizer practices, and soil conditions, all of which are discussed further in Hudman et al, 2012. We show that after NO<sub>x</sub> scaling of NEI11v1, GEOS-Chem is able to represent aircraft observations of NO<sub>x</sub> (Figure 2) and wet deposition observations of nitrate (Figure 3) with good agreement.

We run the following model simulations to account for the 43 Gg of NO<sub>x</sub>

1. GEOS-Chem run with un-scaled NEI11v1 NO<sub>x</sub> emissions and un-scaled fertilizer use.
2. GEOS-Chem run with un-scaled NEI11v1 NO<sub>x</sub> emissions and zero fertilizer use and natural emission from soils.
